# Supplementary material
Source: MDPI journal article supplement (https://www.mdpi.com/2073-4344/14/5/286)
Supplement: s1 [file s1]

**Valorization of *Chlorella* microalgae residual biomass via catalytic acid  
hydrolysis/dehydration and hydrogenolysis/hydrogenation**

Antigoni G. Margellou<sup>1</sup>, Stylianos A. Torofias<sup>1</sup>, Georgios Iakovou<sup>1</sup>  
and Konstantinos S. Triantafyllidis<sup>1, 2,\*</sup>

<sup>1</sup>Department of Chemistry, Aristotle University of Thessaloniki, 54124, Thessaloniki, Greece

<sup>2</sup>Chemical Process and Energy Resources Institute, Centre for Research and Technology Hellas,  
57001 Thessaloniki, Greece

**Supplementary Information**

**Table S1.** Sugars composition of the initial microalgal biomass and the solids obtained after the extraction of lipids and proteins.

| <b>Sample</b>   | <b>Glucose<br/>(wt.%)</b> | <b>Xylose<br/>(wt.%)</b> | <b>Galactose + Arabinose + Mannose<br/>(wt.%)</b> |
|-----------------|---------------------------|--------------------------|---------------------------------------------------|
| <b>LL</b>       | 26.8                      | 3.3                      | 3.4                                               |
| <b>LL-Res-P</b> | 37.7                      | 1.6                      | 4.7                                               |
| <b>ML</b>       | 16.8                      | 5.2                      | 3.1                                               |
| <b>ML-Res</b>   | 22.8                      | 3.5                      | 1.2                                               |
| <b>ML-Res-P</b> | 12.4                      | 11.4                     | 3.9                                               |
| <b>MF</b>       | 8.9                       | 5.9                      | 0.0                                               |
| <b>MF-Res</b>   | 9.9                       | 5.8                      | 0.0                                               |
| <b>MF-Res-P</b> | 10.0                      | 6.0                      | 0.0                                               |
| <b>AF</b>       | 5.7                       | 8.8                      | 0.0                                               |
| <b>AF-Res</b>   | 6.2                       | 11.8                     | 0.0                                               |
| <b>AF-Res-P</b> | 7.8                       | 18.8                     | 0.0                                               |

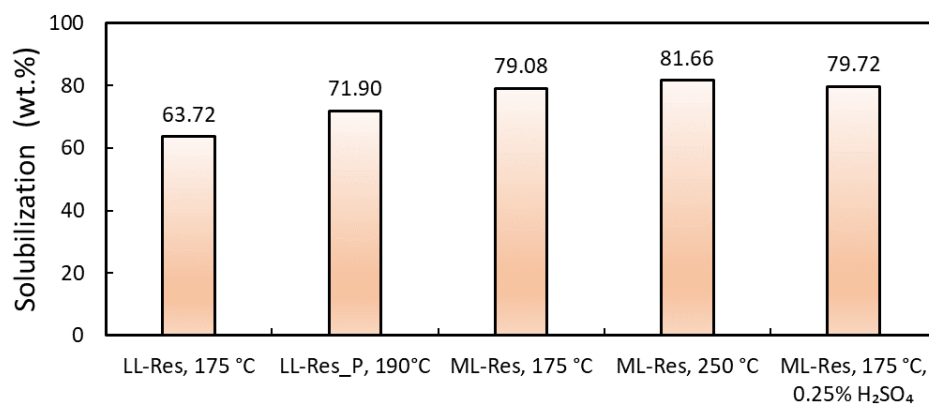

**Figure S1.** Solubilization degree of LL-Res and ML-Res *Chlorella vulgaris* biomass.

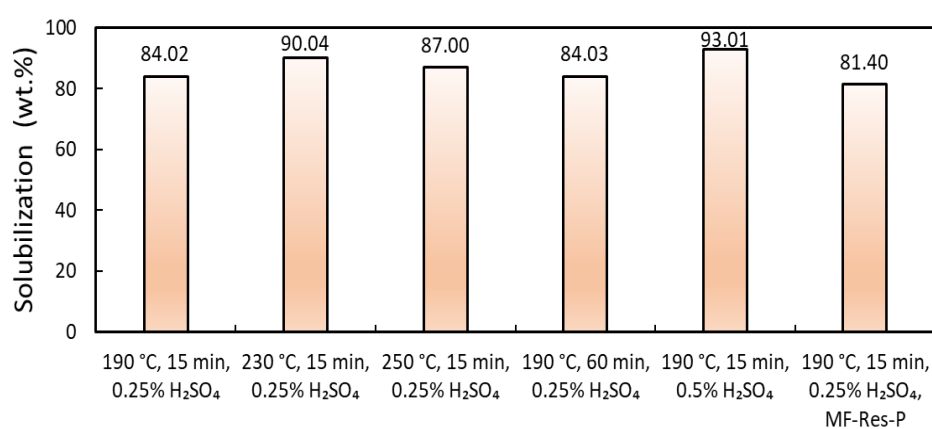

**Figure S2.** Solubilization degree of MF-Res and MF-Res-P *Chlorella vulgaris* biomass.

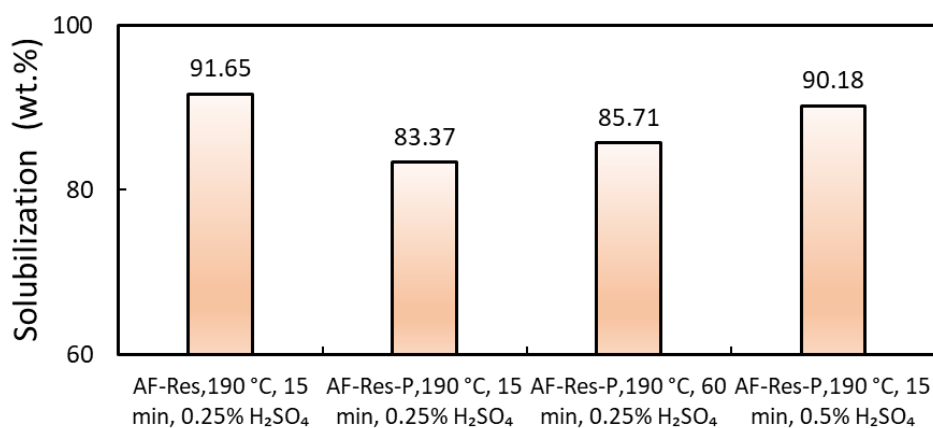

**Figure S3.** Solubilization degree of AF-Res and AF-Res-P *Chlorella vulgaris* biomass.

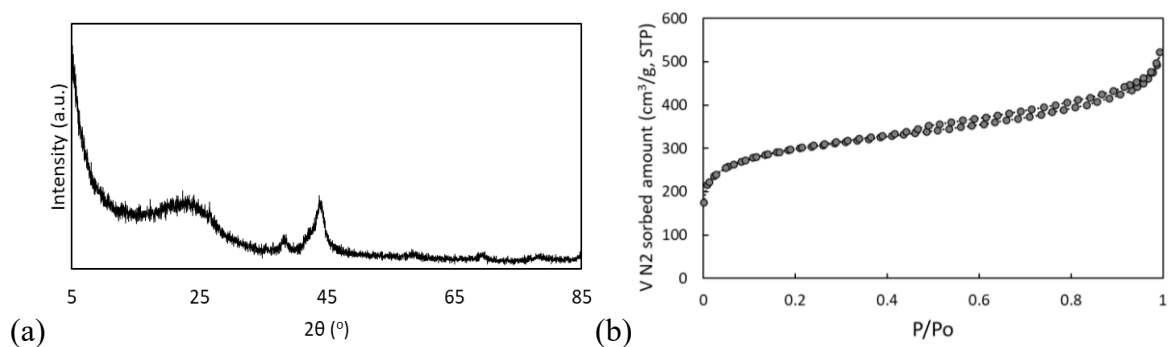

**Figure S4.** (a) XRD and (b) nitrogen adsorption-desorption isotherms of 5%Ru/AC.

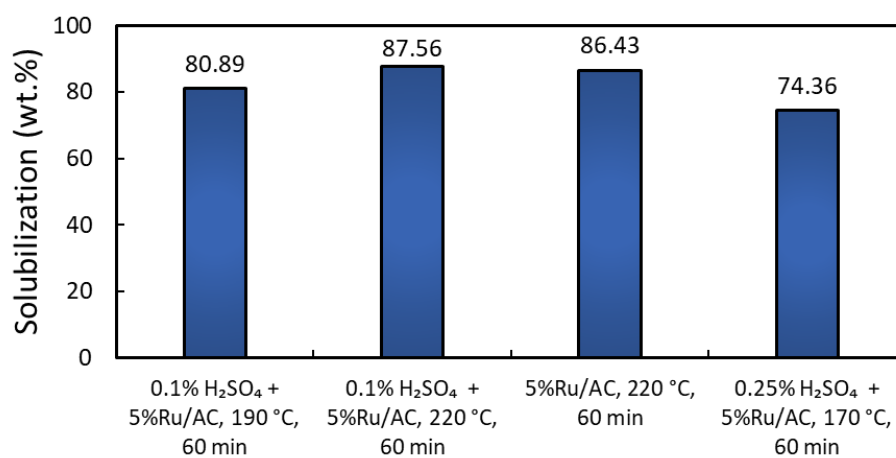

**Figure S5.** Solubilization degree of AF-Res and AF-Res-P *Chlorella vulgaris* biomass.

**Table S2.** Thermal analysis of solids recovered after the hydrolysis experiments of MF-Res biomass.

| Reaction conditions                                  | Mass loss step<br>25-120°C     |                  | Mass loss step<br>120-550 °C   |                  | Residual mass<br>(%, 550°C) |
|------------------------------------------------------|--------------------------------|------------------|--------------------------------|------------------|-----------------------------|
|                                                      | T <sub>DTG max</sub> ,<br>(°C) | Mass<br>loss (%) | T <sub>DTG max</sub> ,<br>(°C) | Mass<br>loss (%) |                             |
| 190 °C, 15 min, 0.25% H <sub>2</sub> SO <sub>4</sub> | 71.6                           | 3.9              | 343                            | 47.5             | 41.6                        |
| 250 °C, 15 min, 0.25% H <sub>2</sub> SO <sub>4</sub> | 64.4                           | 1.7              | 403                            | 47.6             | 50.6                        |
| 190 °C, 60 min, 0.25% H <sub>2</sub> SO <sub>4</sub> | 62.4                           | 2.2              | 352                            | 46.3             | 50.7                        |
| 190 °C, 15 min, 0.5% H <sub>2</sub> SO <sub>4</sub>  | 66.9                           | 2.2              | 352                            | 51.5             | 44.3                        |
